# Supplementary material
Source: PubMed Central journal article supplement (PMC3903239)
Supplement: 1316109111_pnas.201316109SI.pdf [file 1316109111_pnas.201316109SI.pdf]

# Supporting Information

Furutani et al. 10.1073/pnas.1316109111

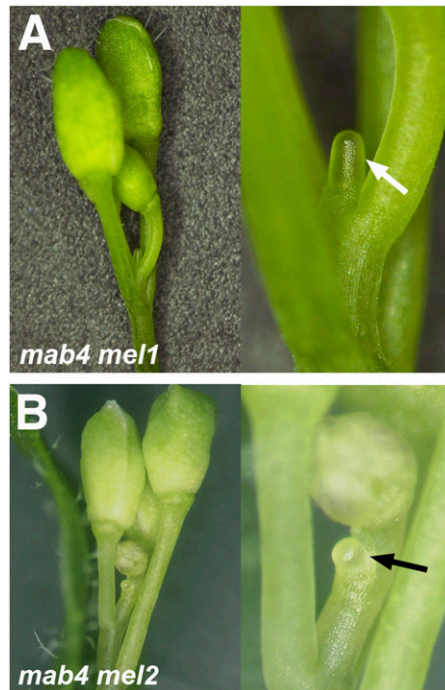

**Fig. S1.** Mutation of *mel1* and *mel2* enhances the *mab4* phenotypes. (A and B) Inflorescences of *mab4-2 mel1-1* (A) and *mab4-2 mel2-1* double mutants (B). The right panel of A and B shows a magnified image around the inflorescence meristem, respectively. The arrows indicate pin-shaped inflorescences.

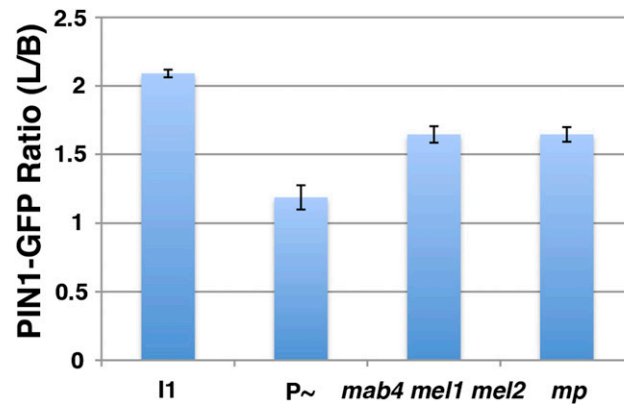

**Fig. S2.** The ratio of PIN1-GFP intensity on lateral side to that on bottom side of plasma membrane of epidermis. The graph displays the ratio of intensity of PIN1-GFP fluorescence on lateral side to that on bottom side of epidermis around the convergence points of PIN1-GFP in wild-type immature primordia (l1) and developing primordia (P~), *mab4-2 mel1-1 mel2-1*, and *mp-T370* ( $N_{l1} = 14$ ,  $N_{P\sim} = 12$ ,  $N_{mab4\ mel1\ mel2} = 12$ ,  $N_{mp} = 12$ ). Error bars represent SEM.

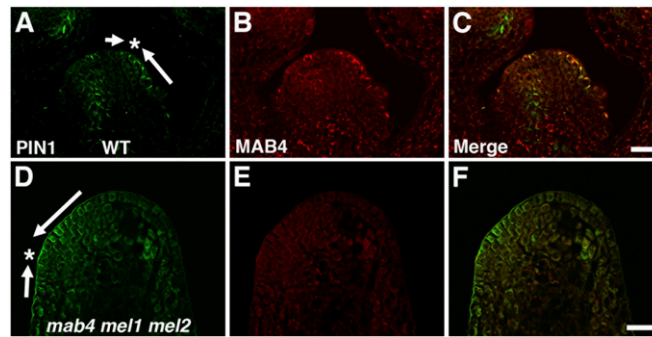

**Fig. S3.** PIN1 and MAB4 localization in *mab4-2 mel1-1 mel2-1* triple mutants. (A–C) Immunolocalization of PIN1 (A) and MAB4 (B) in the wild-type inflorescence meristem. Cells colabeled with PIN1 (green) and MAB4 (red) are seen as yellow signals in the merged image (C). The arrows indicate predicted polar auxin transport. The asterisk indicates a convergence point of PIN1 polarity. (D–F) PIN1 (D) and MAB4 (E) localization in a *mab4-2 mel1-1 mel2-1* inflorescence. Merged image of PIN1 (green) and MAB4 (red) staining (F). (Scale bars: 20 μm.)

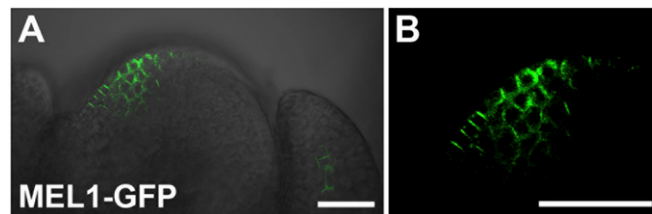

**Fig. S4.** MEL1-GFP localization in the inflorescence meristem. (A and B) GFP fluorescence images of MEL1-GFP, merged with the Nomarski image (A) and magnified at the peripheral region of the meristem (B). (Scale bars: 20 μm.)

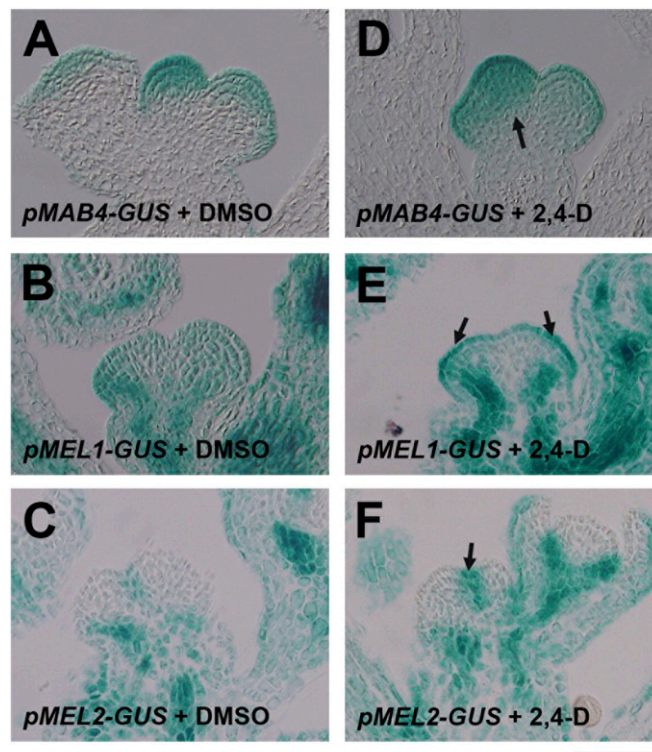

**Fig. S5.** Auxin treatment up-regulated expression of the *MAB4* family genes. (A–F) GUS staining of *pMAB4::GUS* (A and D), *pMEL1::GUS* (B and E), and *pMEL2::GUS* (C and F) in inflorescences, treated with DMSO (A–C) and 10 μM the synthetic auxin 2,4-dichlorophenoxyacetic acid (2,4-D) (D–F) for 6 h, respectively. The arrows in D–F show increased GUS staining. [Scale bar: 100 μm (for A–F)].

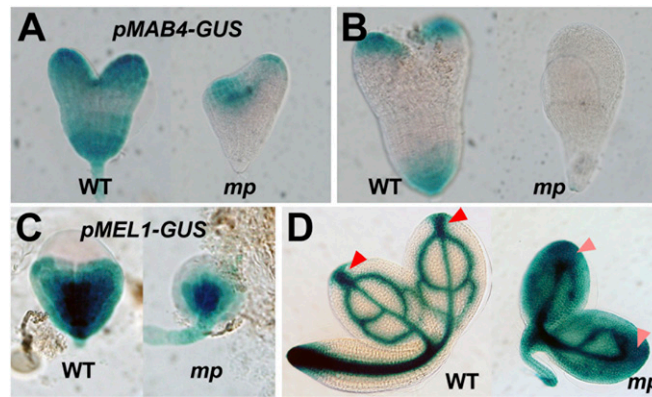

**Fig. 56.** Decreased expression of the *MAB4* family genes in *mp* embryos. (A and B) GUS staining of *pMAB4::GUS* in the wild-type (Left) and *mp-T370* (Right) embryos at the heart (A) and torpedo stage (B). (C and D) GUS staining of *pMEL1::GUS* in the wild-type (Left) and *mp-T370* (Right) embryos at the heart (C) and mature stage (D). The red arrowheads in D indicate GUS activity at the tips of cotyledon. Strong GUS staining was detected in wild type (Left), but reduced GUS staining was found in *mp-T370* (Right).

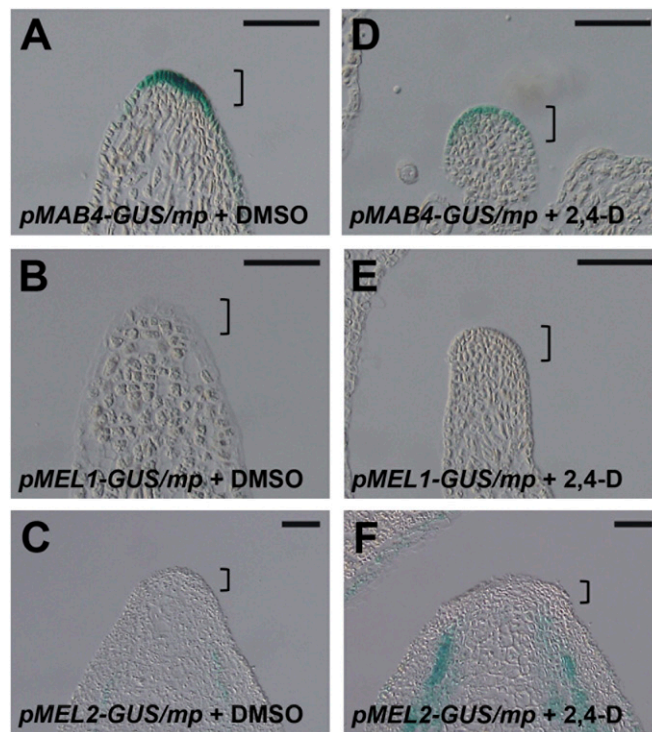

**Fig. 57.** No effect of auxin treatment on the *MAB4* family gene expression in *mp* inflorescences. (A–F) GUS staining of *pMAB4::GUS* (A and D), *pMEL1::GUS* (B and E), and *pMEL2::GUS* (C and F) in *mp-T370* inflorescences, treated with DMSO (A–C) and 10  $\mu$ M 2,4-D (D–F) for 6 h, respectively. The brackets in A–F show meristem area. (Scale bars: 100  $\mu$ m.)

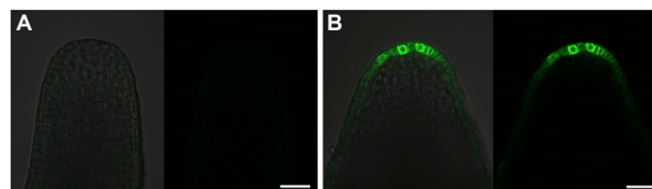

**Fig. 58.** *DR5rev::GFP* expression in *mp* inflorescences. (A and B) *DR5rev::GFP* expression in pin-shaped inflorescences of *mp-T370*. GFP fluorescence images (Right) and merged images with Nomarski images (Left). Many of mutant meristem displayed no GFP signal (A). GFP signal was occasionally found in the L1 layer of the mutant apex (B). (Scale bars: 20  $\mu$ m.)
